# Supplementary material for: Ureaplasma parvum detected in umbilical cord tissues diagnosed with funisitis associated with adverse pregnancy outcomes and neonatal pneumonia
Source: publisher site journal article supplement (doi:10.1515/jpm-2025-0321), 2025-11-18
Supplement: Supplementary file 1 [file j_jpm-2025-0321_suppl_001.docx]

**Table S1** Characteristics of pathogens detected in umbilical cord samples and cause of pregnant outcomes.

| Patient | Gestational week at delivery | Presence of | | | | Pregnant  outcomes |
| --- | --- | --- | --- | --- | --- | --- |
| *U. parvum* | *U. urealyticum* | *M. hominis* | *GBS* |
| Adverse pregnancy | | | | | | |
| Fetal death | | | | | | |
| P1 | 18 | － | － | － | ＋ | Fetal death |
| Miscarriage |  |  |  |  |  |  |
| P2 | 24 | ＋ | － | － | － | PROM/Miscarriage |
| P3 | 25 | ＋ | － | ＋ | － | Miscarriage |
| P4 | 25 | ＋ | － | － | ＋ | PROM/Miscarriage |
| P5 | 21 | － | ＋ | － | － | Miscarriage |
| P6 | 22 | － | － | ＋ | － | Miscarriage |
| P7 | 27 | ＋ | － | － | － | Miscarriage |
| P8 | 26 | ＋ | － | － | － | Miscarriage |
| P9 | 26 | ＋ | － | － | － | PROM/Miscarriage |
| Preterm birth | | | | | | |
| P10 | 28 | ＋ | － | － | － | PROM |
| P11 | 32 | ＋ | － | － | － | TPD |
| P12 | 28 | ＋ | － | － | － | PROM |
| P13 | 32 | － | ＋ | － | － | PROM |
| P14 | 27 | － | ＋ | － | － | Preeclampsia |
| P15 | 36 | － | － | － | ＋ | PROM |
| P16 | 34 | ＋ | － | － | － | TPD |
| P17 | 30 | ＋ | － | － | － | PROM |
| P18 | 30 | ＋ | － | － | － | PROM |
| P19 | 36 | ＋ | － | ＋ | － | PROM |
| P20 | 29 | ＋ | － | － | － | oligohydramnios |
| P21 | 33 | ＋ | － | － | － | TPD |
| P22 | 33 | ＋ | － | － | － | TPD |
| P23 | 31 | ＋ | － | － | － | TPD |
| P24 | 30 | ＋ | － | － | － | TPD |
| P25 | 29 | ＋ | － | － | － | oligohydramnios |
| Term birth | | | | | | |
| P26 | 40 | － | － | － | ＋ | neonate infection |
| P27 | 38 | － | － | － | ＋ | PROM/neonate infection |
| P28 | 40 | － | ＋ | － | ＋ | neonate infection |
| P29 | 41 | － | － | － | ＋ | neonate infection |
| P30 | 39 | － | － | － | ＋ | neonate infection |

PROM, premature rupture of the membranes; FSUA, failure to suppress uterine activity; TPD, threatened preterm delivery. + present, － absent.
